# Supplementary material for: Clozapine suppresses NADPH oxidase activation, counteracts cytosolic H2O2, and triggers early onset mitochondrial dysfunction during adipogenesis of human liposarcoma SW872 cells
Source: PubMed Central journal article supplement — Redox Biol. 2023 Oct 12;67:102915. doi: 10.1016/j.redox.2023.102915 (PMC10623370; doi:10.1016/j.redox.2023.102915), 2023-10-12
Supplement: mmc2.pdf [file mmc2.pdf]

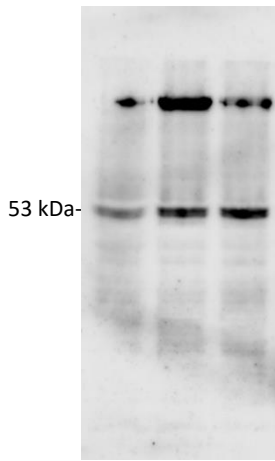

**PPAR $\gamma$**

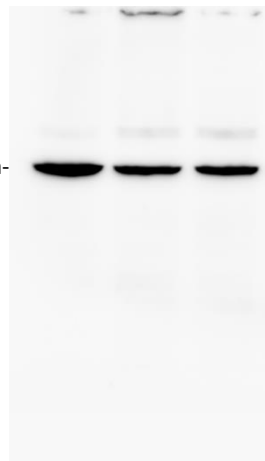

**Actin**

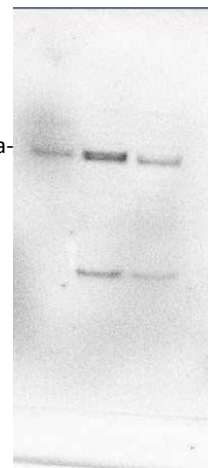

**C/EBP $\beta$**

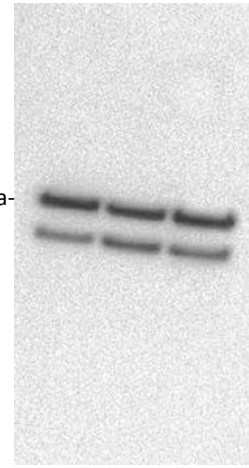

**GAPDH**

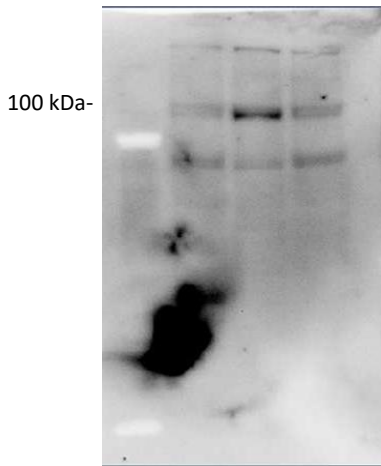

**Nrf2**

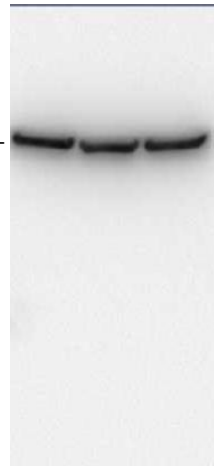

**Actin**

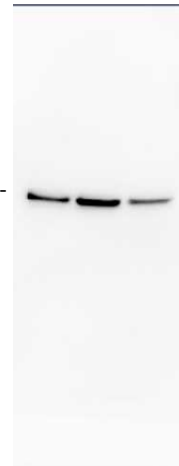

**NQO1**

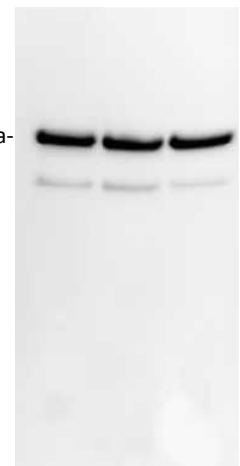

**GAPDH**

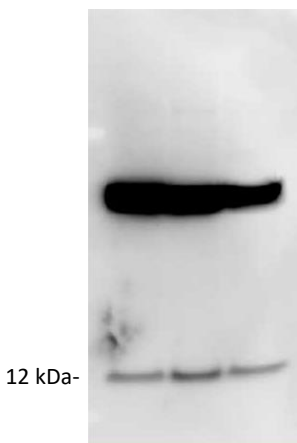

**Trx-1**

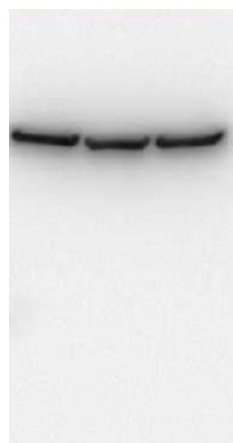

**Actin**

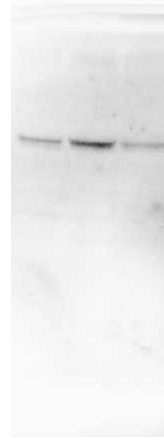

**TrxR-1**

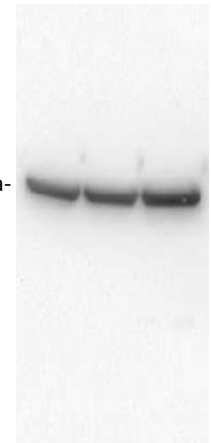

**GAPDH**

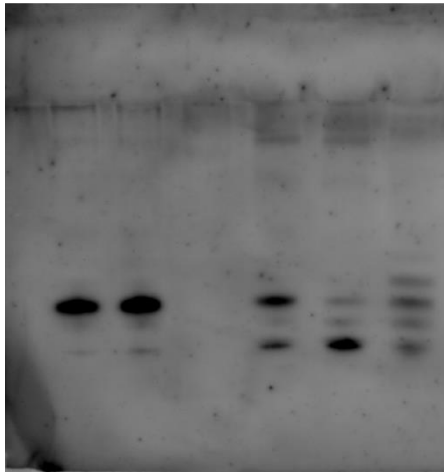

**Redox Western Blot for Trx-2**

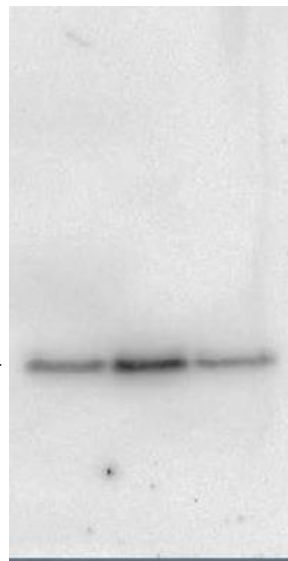

**Trx-2**

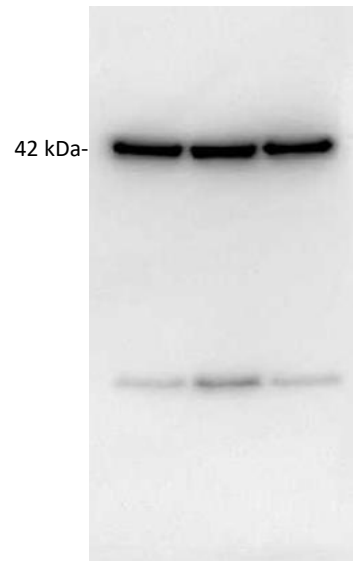

**Actin**

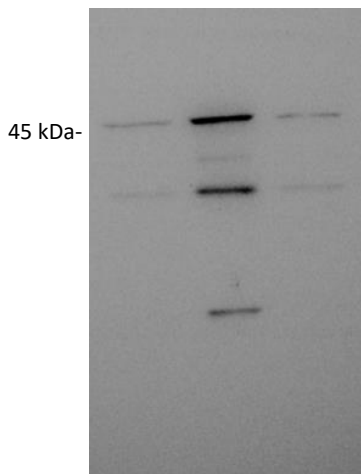

**C/EBPβ**

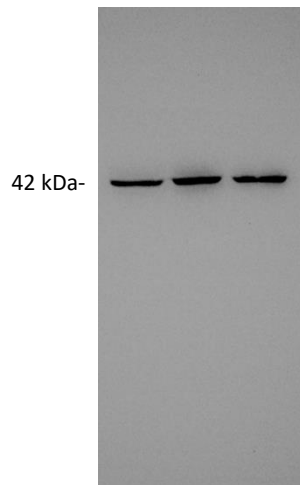

**Actin**
