# Supplementary material for: Clozapine suppresses NADPH oxidase activation, counteracts cytosolic H2O2, and triggers early onset mitochondrial dysfunction during adipogenesis of human liposarcoma SW872 cells
Source: PubMed Central journal article supplement — Redox Biol. 2023 Oct 12;67:102915. doi: 10.1016/j.redox.2023.102915 (PMC10623370; doi:10.1016/j.redox.2023.102915), 2023-10-12
Supplement: mmc5.pdf [file mmc5.pdf]

**Table 1. Human qPCR primers**

| <i>Gene</i>   | <i>Primer forward (5'-3')</i>  | <i>Primer reverse (5'-3')</i> | <i>Ref</i> |
|---------------|--------------------------------|-------------------------------|------------|
| <i>C/ebpβ</i> | CGA AGT TGA TGC AAT CGG TTT    | TTA AGC GAT TAC TCA GGG CCC   | [1]        |
| <i>Gapdh</i>  | CCA TGT TCG TCA TGG GTG TG     | GGT GCT AAG CAG TTG GTG GTG   | [1]        |
| <i>Nrf2</i>   | CCA TTC CTG AGT TAC AGT GTC TT | CAG TTT GGC TTC TGG ACT TGG   |            |

**C/ebpβ**, Homo sapiens CCAAT/Enhancer Binding Protein (C/EBP), Beta; **Gapdh**, Homo sapiens Glyceraldehyde-3-Phosphate Dehydrogenase; **Nrf2**, Homo sapiens Nuclear Factor Erythroid-Derived 2-Like 2

**Table 2. Murine qPCR primers**

| <i>Gene</i>   | <i>Primer forward (5'-3')</i> | <i>Primer reverse (5'-3')</i> | <i>Ref</i> |
|---------------|-------------------------------|-------------------------------|------------|
| <i>C/ebpα</i> | TGG ACA AGA ACA GCA ACG AG    | TCA CTG GTC AAC TCC AGC AC    | [2]        |
| <i>C/ebpβ</i> | ACC GGG TTT CGG GAC TTG A     | TTG CGT CAG TCC CGT GTC CA    | [1]        |
| <i>C/ebpδ</i> | TCC ACG ACT CCT GCC ATG TAC G | GTG GTT GCT GTT GAA GAG GTC G | [3]        |
| <i>Glut4</i>  | GCA ACG TGG CTG GGT AGG CA    | CCC ACA GAG AAG ATG GCC ACG G | [4]        |
| <i>Hprt</i>   | CTC AGA CCG CTT TTT GCC G     | GCT AAT CAC GAC GCT GGG A     |            |
| <i>Pparγ</i>  | AGG CTC CAT AAA GTC ACC AAA G | CTG GCC TCC CTG ATG AAT AAA G | [5]        |

**C/ebpα**, Mus musculus CCAAT/Enhancer Binding Protein (C/EBP), Alpha; **C/ebpβ**, Mus musculus CCAAT/Enhancer Binding Protein (C/EBP), Beta; **C/ebpδ**, Mus musculus CCAAT/Enhancer Binding Protein (C/EBP), Delta; **Glut4**, Mus musculus Glucose Transporter Type 4, Insulin-Responsive; **Hprt**, Mus musculus Hypoxanthine Guanine Phosphoribosyl Transferase; **Pparγ**, Mus musculus Peroxisome Proliferator-Activated Receptor Gamma.

**REFERENCES:**

- [1] L. Galluzzi, A. Diotallevi, M. De Santi, M. Ceccarelli, F. Vitale, G. Brandi, M. Magnani, Leishmania infantum Induces Mild Unfolded Protein Response in Infected Macrophages, PloS one 11(12) (2016) e0168339.
- [2] Y. Chen, G.H. Cai, B. Xia, X. Wang, C.C. Zhang, B.C. Xie, X.C. Shi, H. Liu, J.F. Lu, R.X. Zhang, M.Q. Zhu, M. Liu, S.Z. Yang, D. Yang Zhang, X.Y. Chu, R. Khan, Y.L. Wang, J.W. Wu, Mitochondrial aconitase controls adipogenesis through mediation of cellular ATP production, FASEB J 34(5):6688-6702 (2020).
- [3] P. Castillo, O. Aisagbonhi, C.C. Saenz, W.M. ElShamy, Novel insights linking BRCA1-IRIS role in mammary gland development to formation of aggressive PABCs: the case for longer breastfeeding, Am J Cancer Res. 12(1):396-426 (2022).
- [4] L. Gatticchi, M. Petricciuolo, P. Scarpelli, L. Macchioni, L. Corazzi, R. Roberti, Tm7sf2 gene promotes adipocyte differentiation of mouse embryonic fibroblasts and improves insulin sensitivity, Biochim Biophys Acta Mol Cell Res 1868(1)(2021) 118897.
- [5] V. Scalcon, A. Folda, M.G. Lupo, F. Tonolo, N. Pei, I. Battisti, N. Ferri, G. Arrigoni, A. Bindoli, A. Holmgren, L. Coppo, M.P. Rigobello, Mitochondrial depletion of glutaredoxin 2 induces metabolic dysfunction-associated fatty liver disease in mice, Redox Biol (51):102277 (2022).
