# Supplementary figures and images for: Clozapine suppresses NADPH oxidase activation, counteracts cytosolic H2O2, and triggers early onset mitochondrial dysfunction during adipogenesis of human liposarcoma SW872 cells
Source: PubMed Central journal article supplement — Redox Biol. 2023 Oct 12;67:102915. doi: 10.1016/j.redox.2023.102915 (PMC10623370; doi:10.1016/j.redox.2023.102915), 2023-10-12

# A) T0

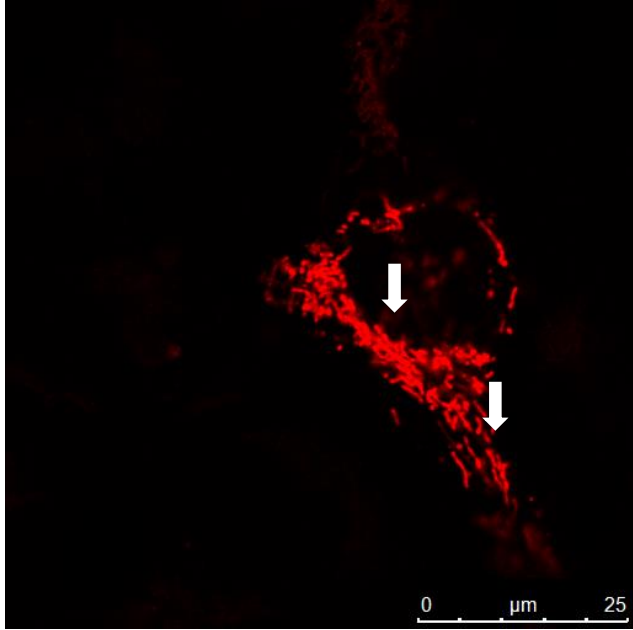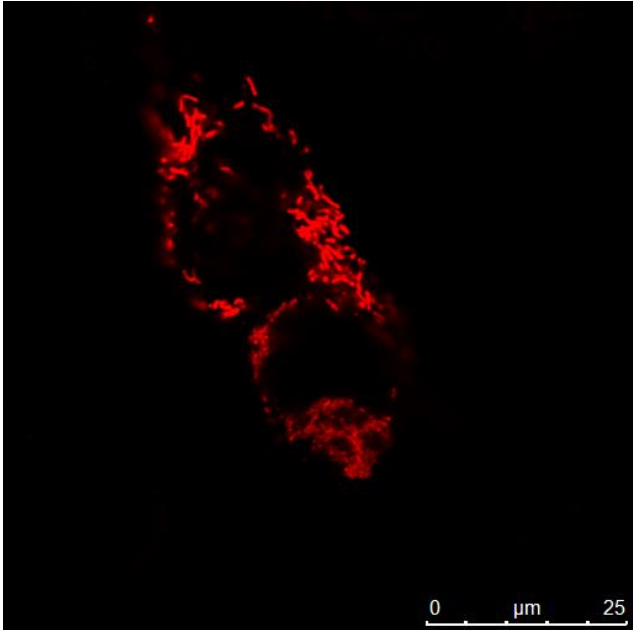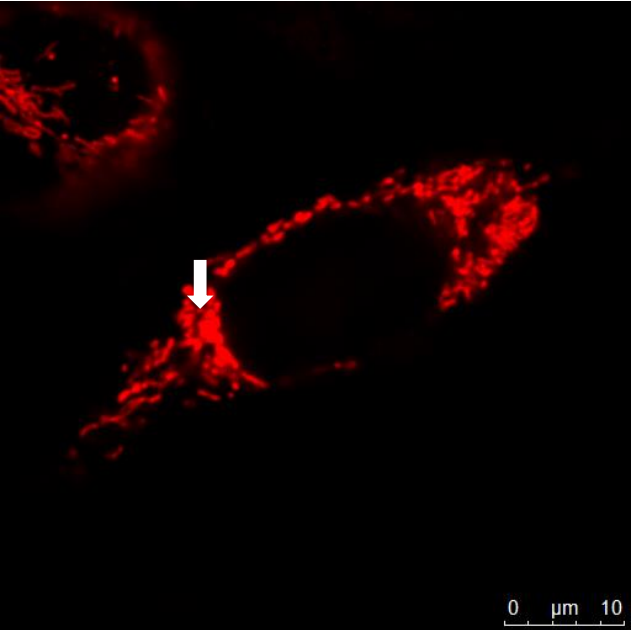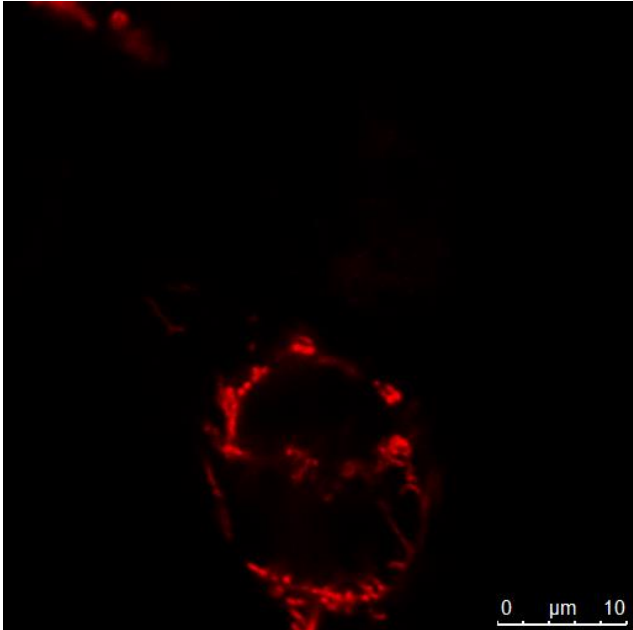

# B) T3 CTR

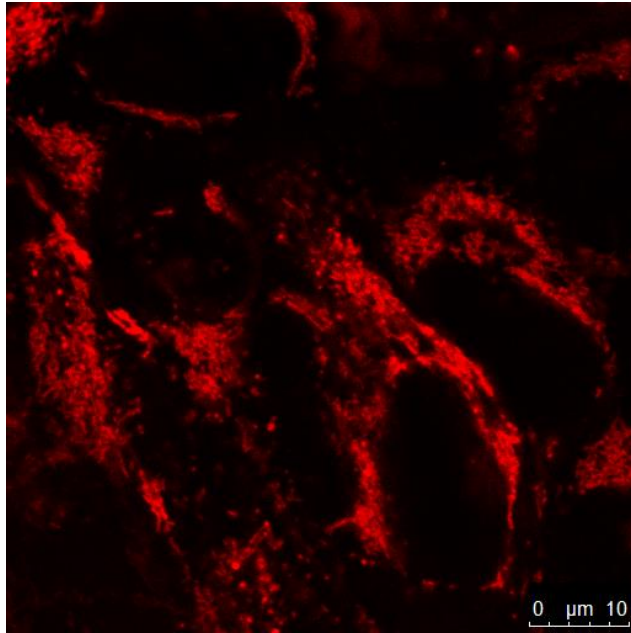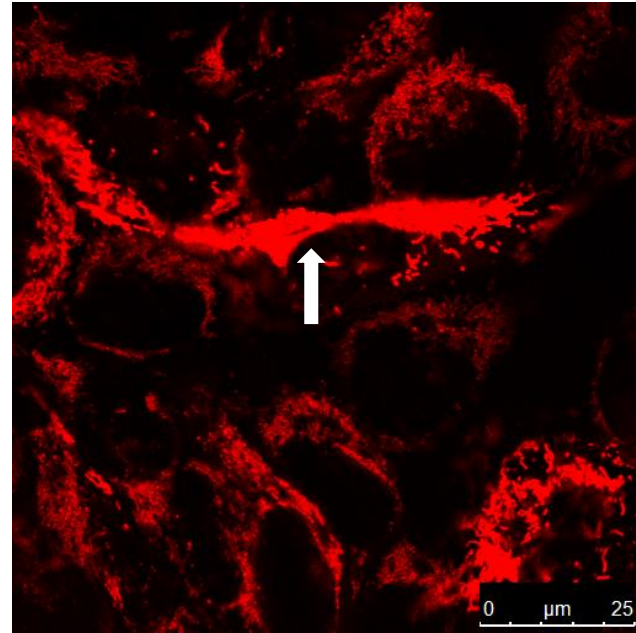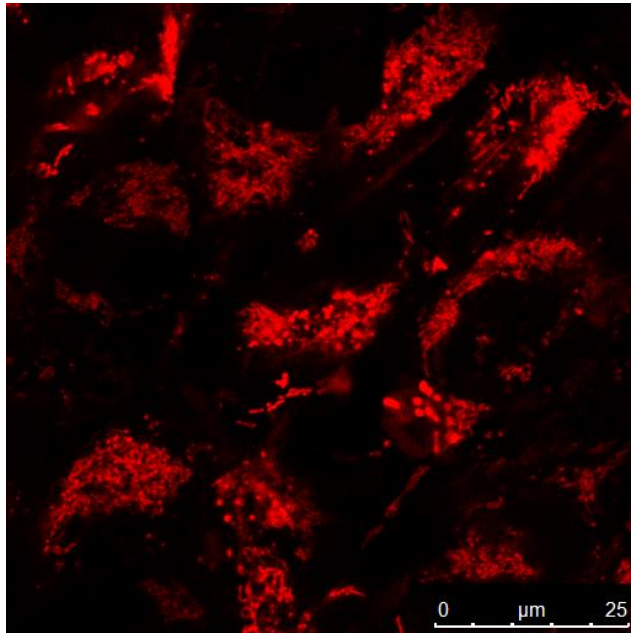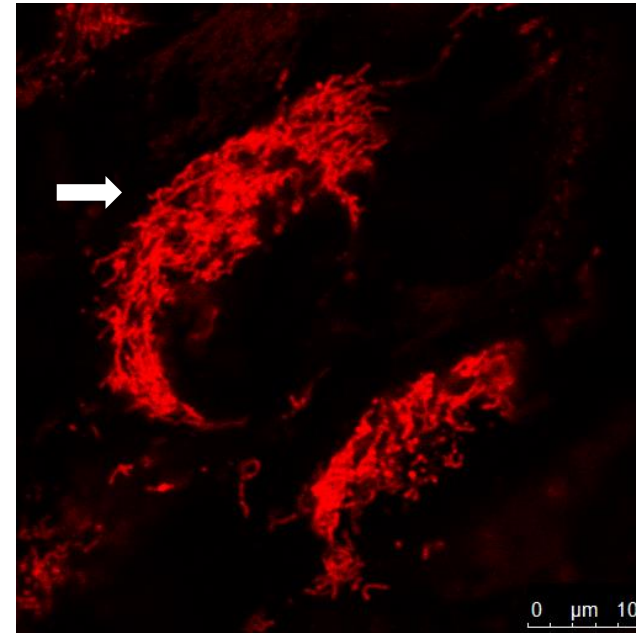

# C) T3+CLZ

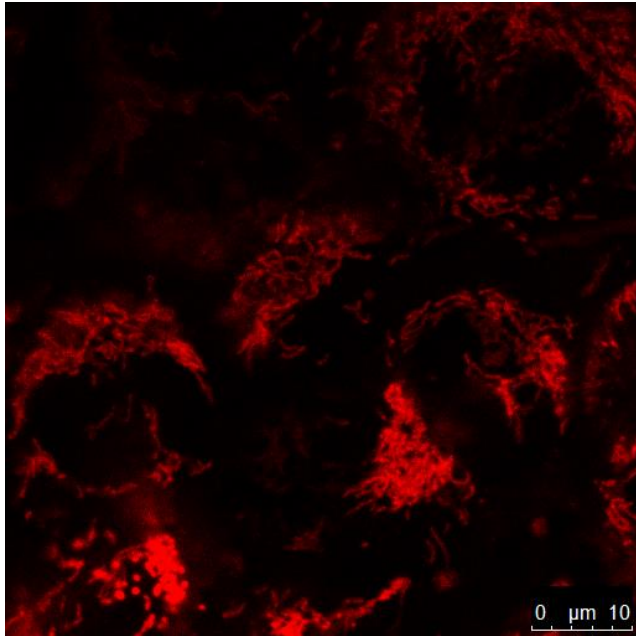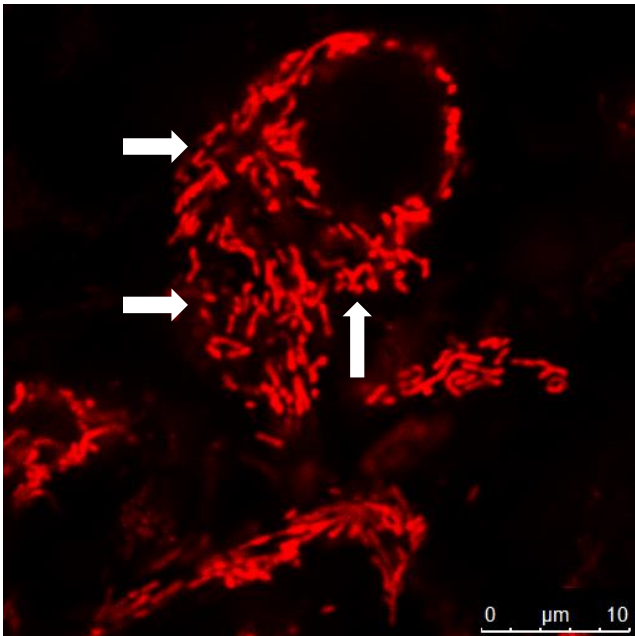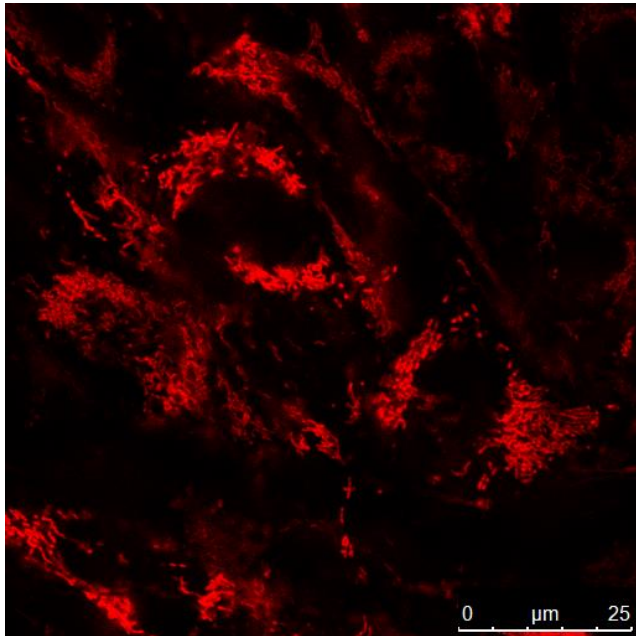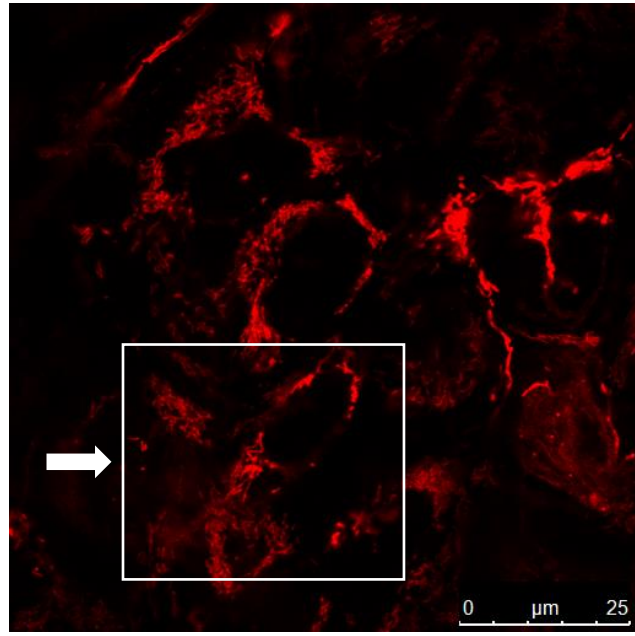

Supplement: mmc1.pdf [file mmc1.pdf]

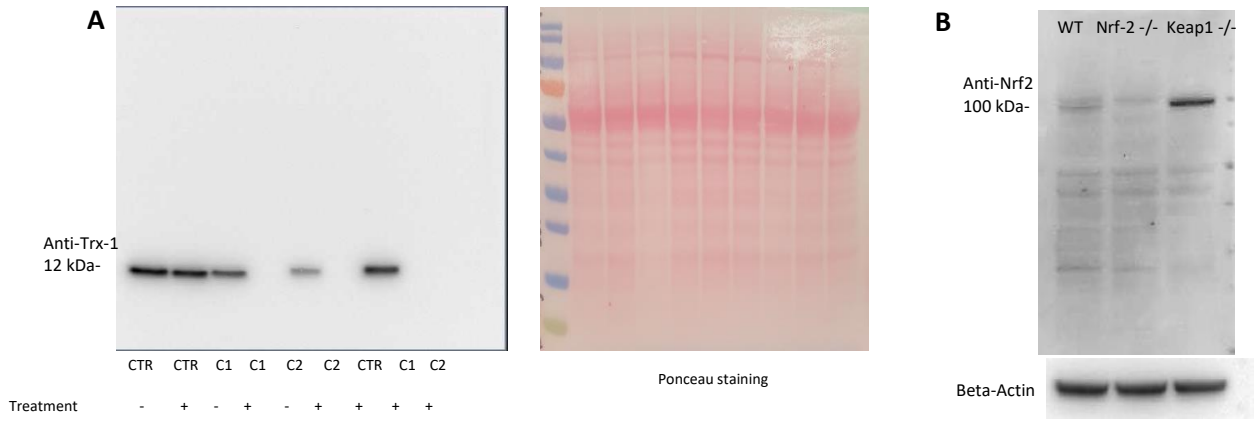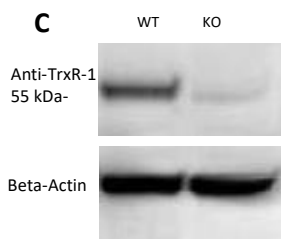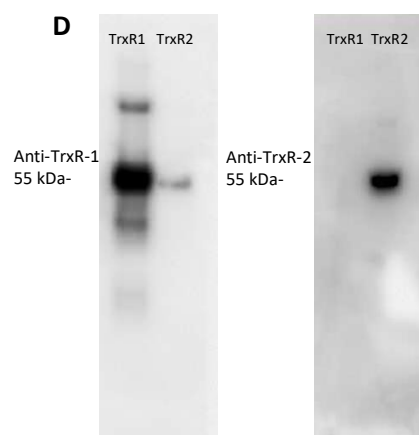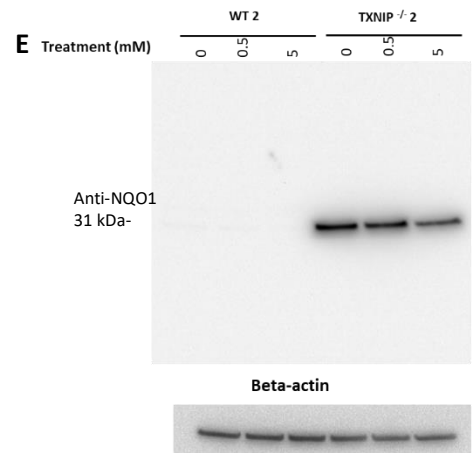

Supplement: mmc3.pdf [file mmc3.pdf]

T0

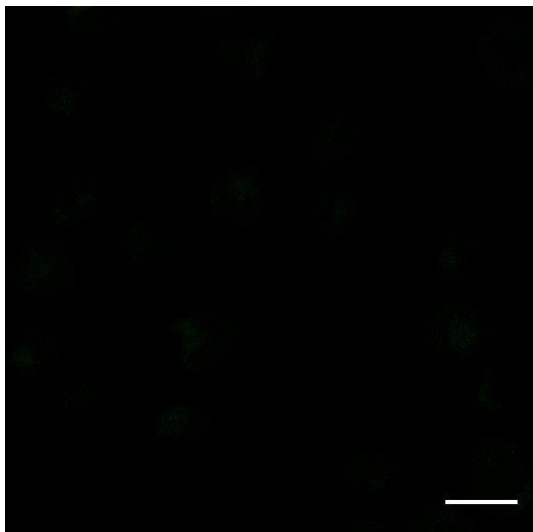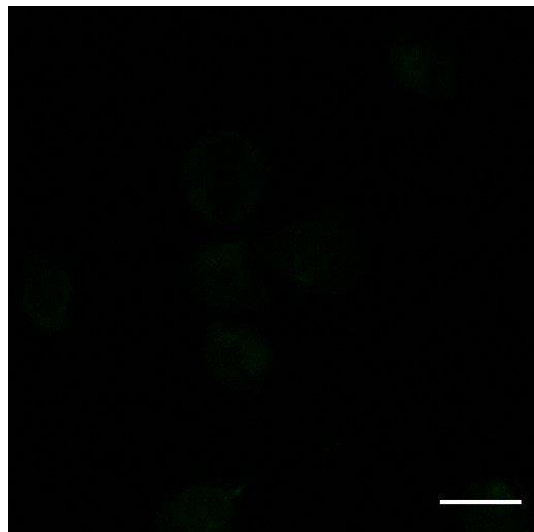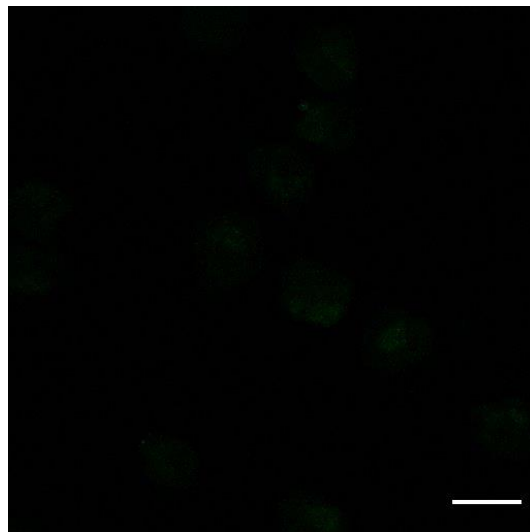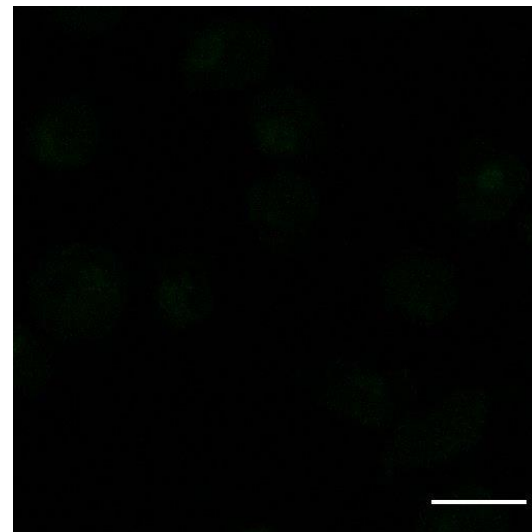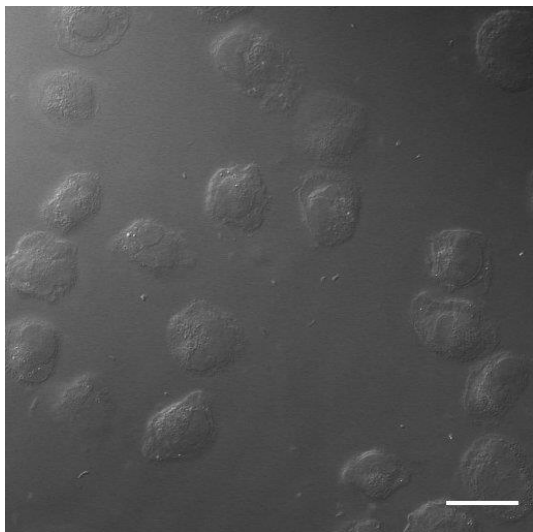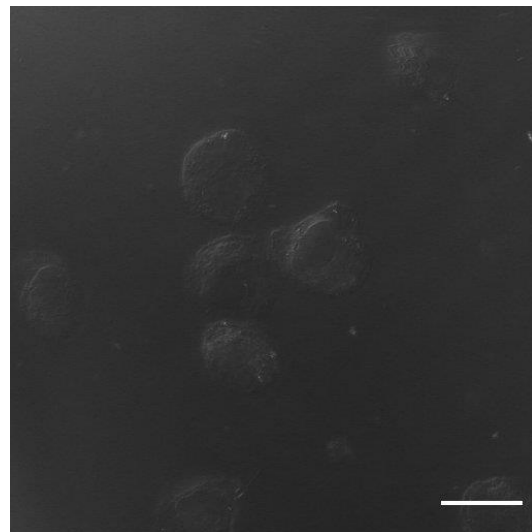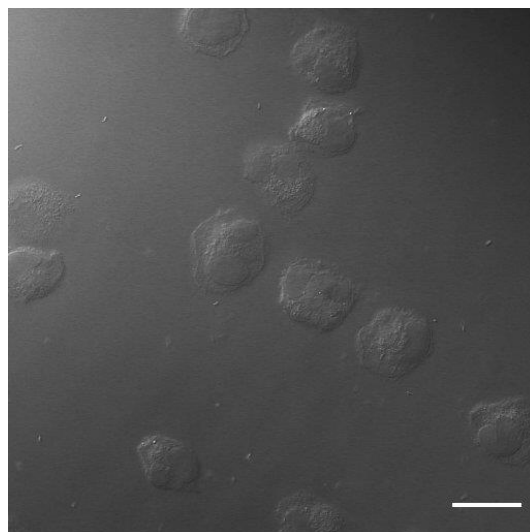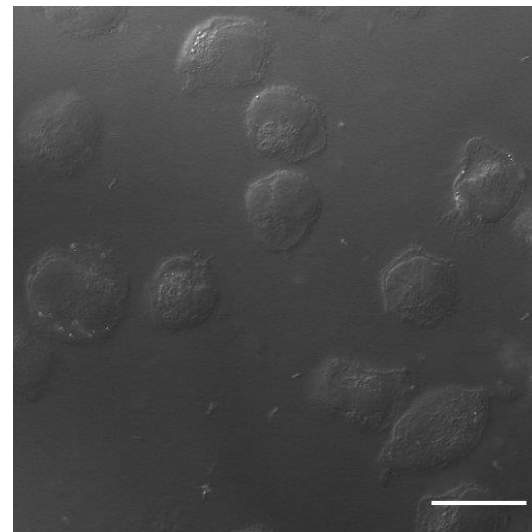

T3 CTR

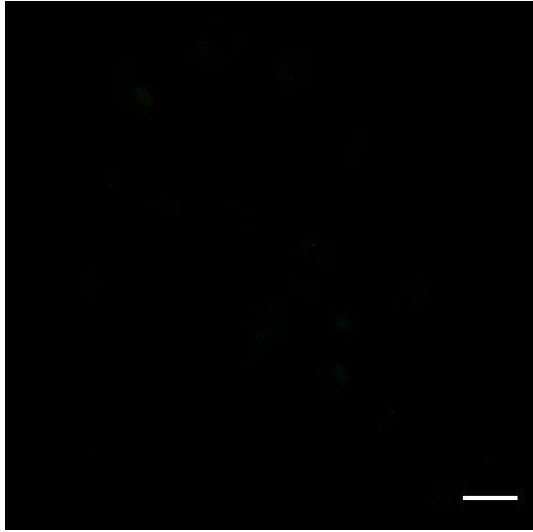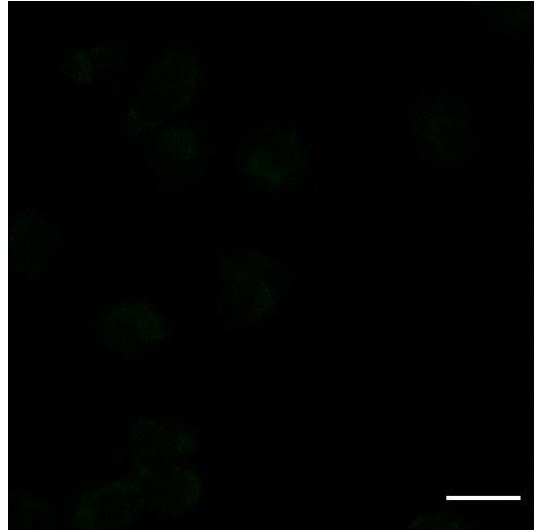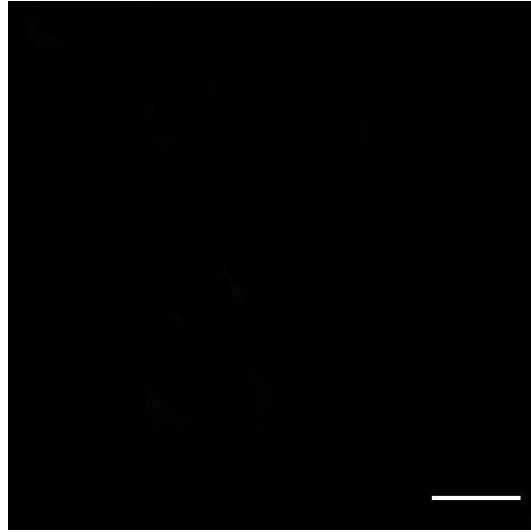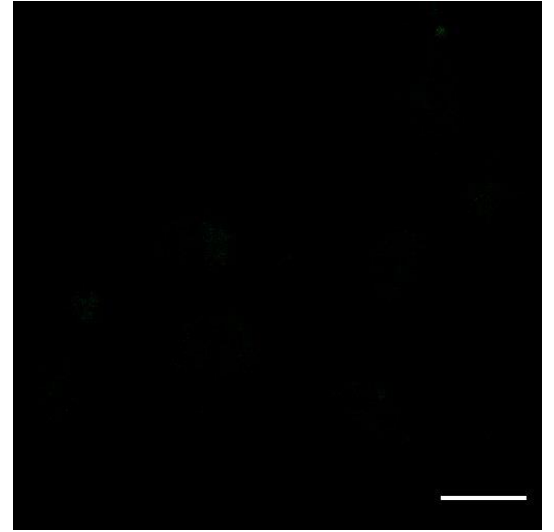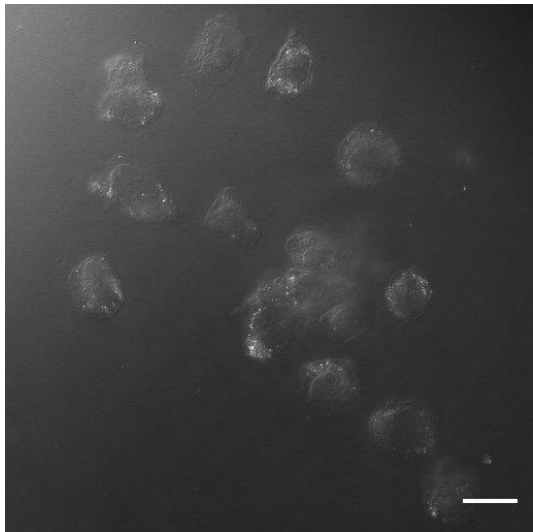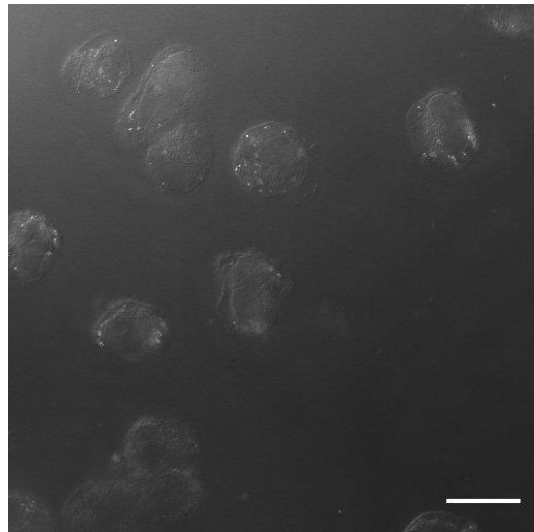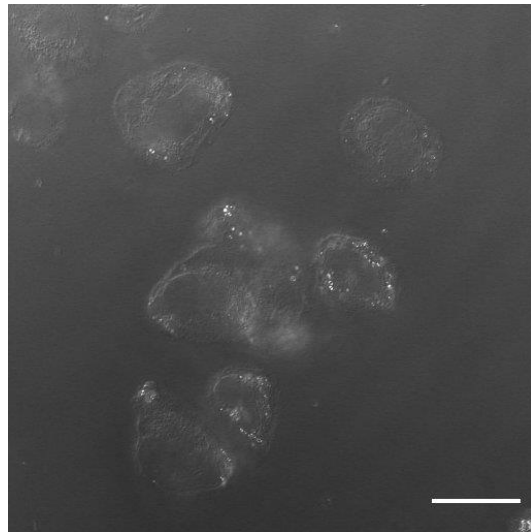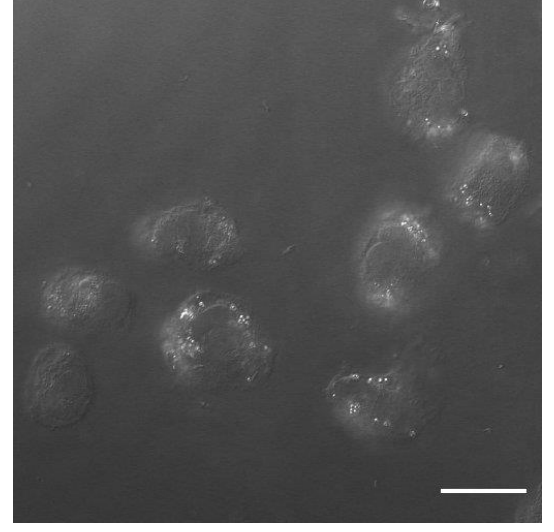

T3+CLZ

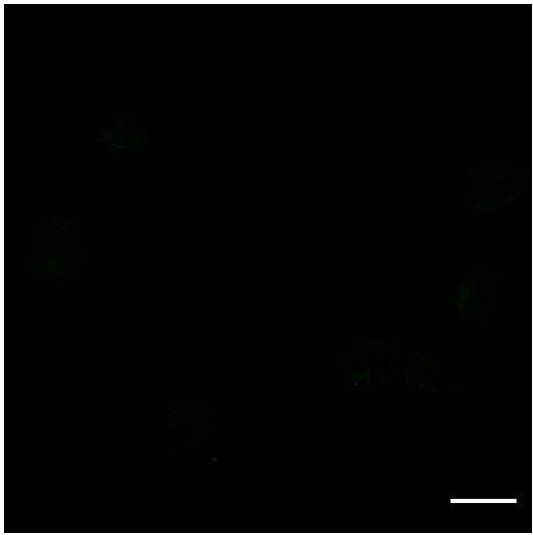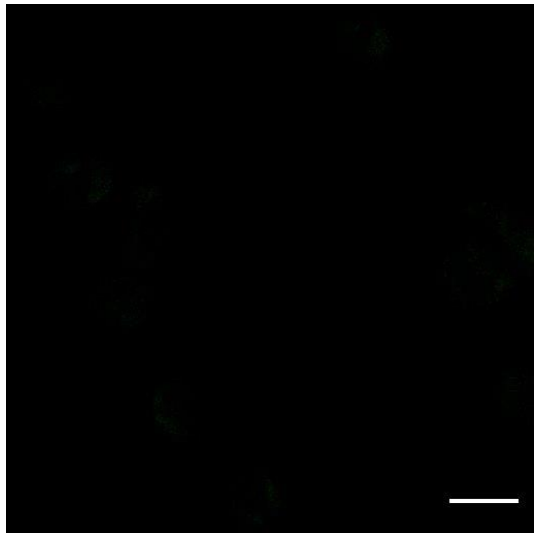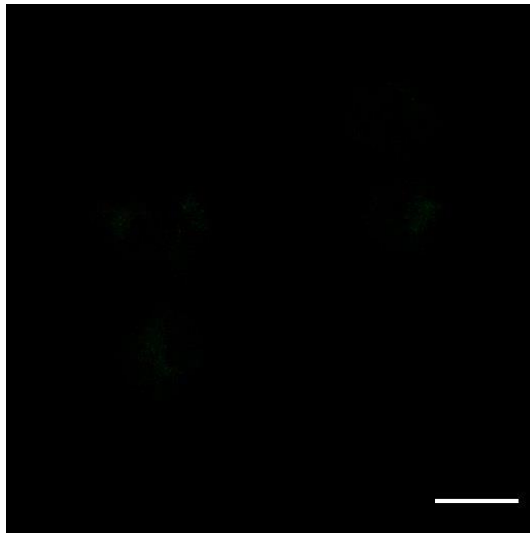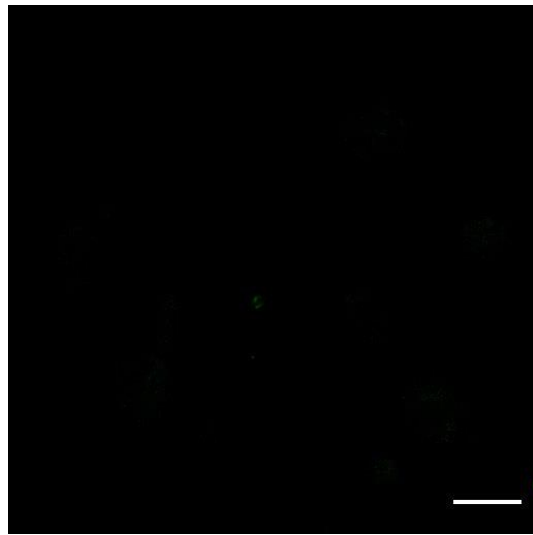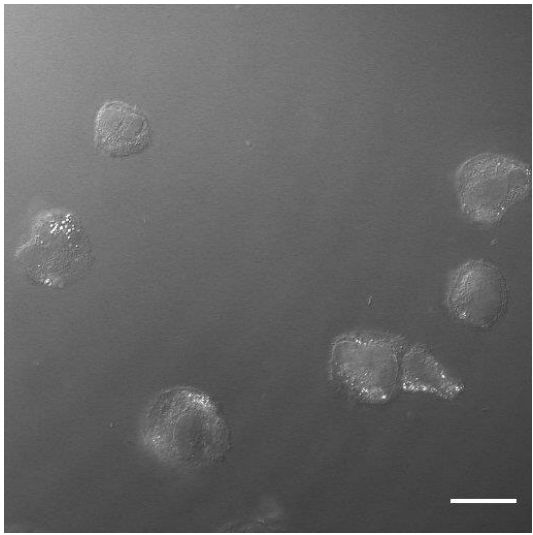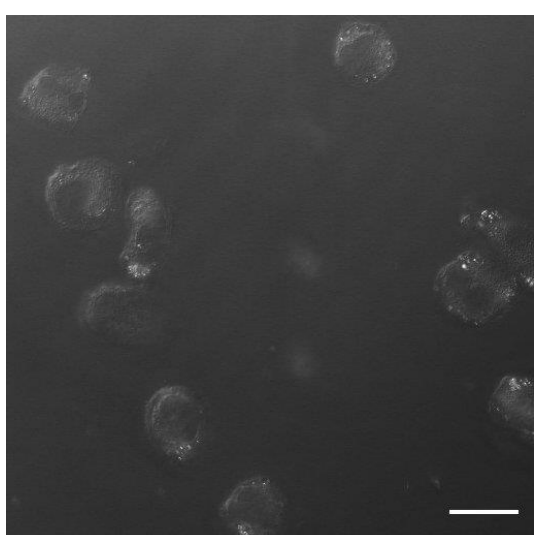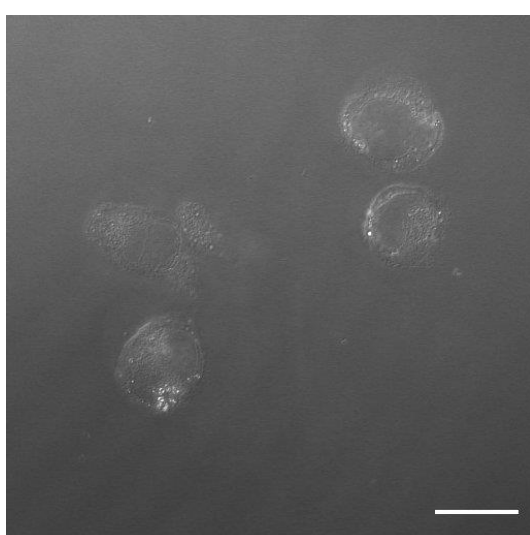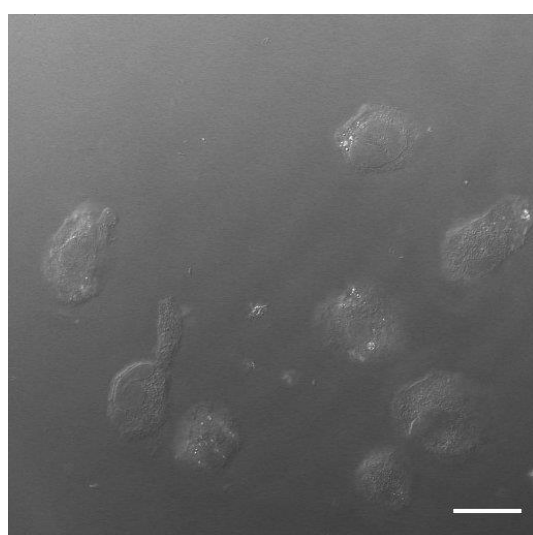

Supplement: mmc4.pdf [file mmc4.pdf]
